# Supplementary material for: Personality Traits and Annual Income Determine the Willingness to Pay for a Single Tooth Implant
Source: MDPI journal article supplement (doi:10.3390/healthcare9080952), 2021-07-29
Supplement: s1 [file s1]

## Supplementary Material

### Personality traits and income determine the willingness to pay for a single tooth implant

Shirlene Foo Yih Ting<sup>1#</sup>, Kimberley Chew Wen Chien<sup>1#</sup>, Nurul Haniz Binti Ramzi<sup>2</sup>, Allan Pau Kah Heng<sup>1</sup>, Rohit Kunnath Menon<sup>1\*</sup>

Affiliations:

<sup>1</sup>School of Dentistry, International Medical University, 57000 Kuala Lumpur, Malaysia

<sup>2</sup>Lecturer, Institute for Research, Development and Innovation, International Medical University, 57000 Kuala Lumpur, Malaysia

<sup>#</sup> Equal contribution

\* Corresponding author

#### Table S1. Questionnaire on demographic factors

1. Gender  
Male  
Female
2. What is your basic education received?  
Comprehensive school  
Matriculation
3. Professional training  
Vocational qualification (school level)  
Vocational qualification (technical college)  
University or equivalent educational level
4. What is your current working situation?  
Working  
Not working
5. What is your professional status?  
Entrepreneur

Upper clerical employee  
 Lower clerical employee  
 Worker  
 Student  
 Other \_\_\_\_\_

6. Annual income  
 < RM 50000  
 RM 50000 - 100000  
 > RM 100000
  
7. What is your year of birth?  
 \_\_\_\_\_
  
8. Where was your last dental visit?  
 Private clinic  
 Public sector  
 Elsewhere
  
9. What would be the highest price you would be prepared to pay to replace a single tooth?  
 \_\_\_\_\_

**Table S2. Questionnaire to assess personality traits (OCEAN model)**

**Part A Openness to Experience**

|                                       | Strongly Agree | Agree | Neutral | Disagree | Strongly Disagree |
|---------------------------------------|----------------|-------|---------|----------|-------------------|
| I am curious about many things        |                |       |         |          |                   |
| I always come up with new ideas.      |                |       |         |          |                   |
| I am creative and a deep thinker      |                |       |         |          |                   |
| I have an active imagination          |                |       |         |          |                   |
| I am inventive                        |                |       |         |          |                   |
| I value artistic experiences          |                |       |         |          |                   |
| I prefer work that is routine         |                |       |         |          |                   |
| I like to reflect and play with ideas |                |       |         |          |                   |

|                                           |  |  |  |  |  |
|-------------------------------------------|--|--|--|--|--|
| I have few artistic interest              |  |  |  |  |  |
| I am advanced in art, music or literature |  |  |  |  |  |

### Part B Conscientiousness

|                                           | Strongly Agree | Agree | Neutral | Disagree | Strongly Disagree |
|-------------------------------------------|----------------|-------|---------|----------|-------------------|
| I can be somewhat careless                |                |       |         |          |                   |
| I carry out my job thoroughly             |                |       |         |          |                   |
| I am a reliable worker                    |                |       |         |          |                   |
| I tend to be disorganized                 |                |       |         |          |                   |
| I tend to be lazy                         |                |       |         |          |                   |
| I persevere until the task is finished    |                |       |         |          |                   |
| I do things efficiently                   |                |       |         |          |                   |
| I make plans and follow through with them |                |       |         |          |                   |
| I am easily distracted                    |                |       |         |          |                   |

### Part C Extraversion

|                                          | Strongly Agree | Agree | Neutral | Disagree | Strongly Disagree |
|------------------------------------------|----------------|-------|---------|----------|-------------------|
| I see myself as someone who is reserved. |                |       |         |          |                   |
| I am talkative                           |                |       |         |          |                   |
| I am full of energy                      |                |       |         |          |                   |
| I tend to be quiet                       |                |       |         |          |                   |
| I have an assertive personality          |                |       |         |          |                   |
| I am sometimes shy and inhibited         |                |       |         |          |                   |
| I am outgoing and sociable               |                |       |         |          |                   |

**Part D Agreeableness**

|                                               | Strongly Agree | Agree | Neutral | Disagree | Strongly Disagree |
|-----------------------------------------------|----------------|-------|---------|----------|-------------------|
| I am helpful and unselfish with others        |                |       |         |          |                   |
| I tend to find fault with others.             |                |       |         |          |                   |
| I tend to start quarrel with others.          |                |       |         |          |                   |
| I have a forgiving nature                     |                |       |         |          |                   |
| I am generally trusting                       |                |       |         |          |                   |
| I can be cold and isolated.                   |                |       |         |          |                   |
| I am considerate and kind to almost everyone. |                |       |         |          |                   |
| I am sometimes rude to others.                |                |       |         |          |                   |
| I like to cooperate with others.              |                |       |         |          |                   |

**Part E Neuroticism**

|                                              | Strongly Agree | Agree | Neutral | Disagree | Strongly Disagree |
|----------------------------------------------|----------------|-------|---------|----------|-------------------|
| I am relaxed and can handle stress well.     |                |       |         |          |                   |
| I am depressed and blue                      |                |       |         |          |                   |
| I can be tense                               |                |       |         |          |                   |
| I worry a lot                                |                |       |         |          |                   |
| I am emotionally stable and not easily upset |                |       |         |          |                   |
| I can be moody                               |                |       |         |          |                   |
| I remain calm in tense situation             |                |       |         |          |                   |
| I get nervous easily                         |                |       |         |          |                   |

**Table S3. Price charged for a dental implant from 25 dental clinics in Kuala Lumpur**

|    |                       |
|----|-----------------------|
| 1  | RM 5500               |
| 2  | RM 5500               |
| 3  | RM 5900               |
| 4  | RM 5999               |
| 5  | RM 6000               |
| 6  | RM 6000               |
| 7  | RM 6000               |
| 8  | RM 6000               |
| 9  | RM 6000               |
| 10 | RM 6000               |
| 11 | RM 6000               |
| 12 | RM 6000               |
| 13 | <b>RM 6000 Median</b> |
| 14 | RM 6000               |
| 15 | RM 6500               |
| 16 | RM 7000               |
| 17 | RM 7000               |
| 18 | RM 7000               |
| 19 | RM 7000               |
| 20 | RM 7000               |
| 21 | RM 7000               |
| 22 | RM 7500               |
| 23 | RM 7500               |
| 24 | RM 8000               |
| 25 | RM 9500               |

**Table S4. Association of Conscientiousness with willingness to pay the median price**

| Variable                                            | Personality constructs | F     | Sig         |
|-----------------------------------------------------|------------------------|-------|-------------|
| <b>Willingness to pay the median price (Yes/No)</b> | Openness               | 1.731 | 0.192       |
|                                                     | Conscientiousness      | 6.838 | <b>0.01</b> |
|                                                     | Extraversion           | 0.737 | 0.393       |
|                                                     | Agreeableness          | 1.153 | 0.286       |
|                                                     | Neuroticism            | 0.797 | 0.374       |

**Table S5. Maximum or minimum price that patients are willing to pay for a single tooth implant**

| Patient no: | Price (RM) |
|-------------|------------|
| 1           | 1500       |
| 2           | 8000       |
| 3           | 1000       |
| 4           | 7200       |
| 5           | 3000       |
| 6           | 3000       |
| 7           | 6000       |
| 8           | 2000       |
| 9           | 6400       |
| 10          | 2000       |
| 11          | 1000       |
| 12          | 1500       |
| 13          | 6000       |
| 14          | 10000      |
| 15          | 9900       |
| 16          | 1000       |
| 17          | 3000       |
| 18          | 1000       |
| 19          | 6000       |
| 20          | 10000      |
| 21          | 500        |
| 22          | 2000       |
| 23          | 2000       |
| 24          | 10000      |
| 25          | 1000       |
| 26          | 3000       |
| 27          | 7000       |
| 28          | 2000       |
| 29          | 8000       |
| 30          | 6000       |
| 31          | 6000       |
| 32          | 10000      |
| 33          | 6000       |
| 34          | 10000      |
| 35          | 15000      |
| 36          | 6000       |
| 37          | 4500       |
| 38          | 7000       |
| 39          | 10000      |
| 40          | 3000       |
| 41          | 1000       |
| 42          | 3000       |
| 43          | 5000       |
| 44          | 3000       |
| 45          | 1000       |
| 46          | 900        |
| 47          | 6000       |
| 48          | 1000       |
| 49          | 600        |

|     |       |
|-----|-------|
| 50  | 4000  |
| 51  | 1500  |
| 52  | 1000  |
| 53  | 4000  |
| 54  | 3000  |
| 55  | 10000 |
| 56  | 1500  |
| 57  | 1000  |
| 58  | 2000  |
| 59  | 2000  |
| 60  | 4000  |
| 61  | 1000  |
| 62  | 3000  |
| 63  | 10000 |
| 64  | 2000  |
| 65  | 2000  |
| 66  | 1500  |
| 67  | 1000  |
| 68  | 100   |
| 69  | 100   |
| 70  | 250   |
| 71  | 1000  |
| 72  | 2000  |
| 73  | 4000  |
| 74  | 500   |
| 75  | 6000  |
| 76  | 4000  |
| 77  | 5000  |
| 78  | 500   |
| 79  | 1000  |
| 80  | 1000  |
| 81  | 1000  |
| 82  | 3500  |
| 83  | 6000  |
| 84  | 500   |
| 85  | 6000  |
| 86  | 500   |
| 87  | 300   |
| 88  | 10000 |
| 89  | 2000  |
| 90  | 6000  |
| 91  | 2000  |
| 92  | 2000  |
| 93  | 500   |
| 94  | 1000  |
| 95  | 4000  |
| 96  | 2000  |
| 97  | 1000  |
| 98  | 12000 |
| 99  | 2500  |
| 100 | 1000  |
